# Supplementary material
Source: Springer Nature journal article supplement (https://www.springermedizin.de/resource/supplementary/13054_2013_1948_MOESM1_ESM.docx/9711854)
Supplement: MOESM1 [file 9711854]

**A**

**B**

**C**
